# Supplementary material for: The Readiness to Reconcile Inventory
Source: Atypon-hosted journal article supplement (doi:10.1027/1015-5759/a000304), 2015-12-22
Supplement: 1015-5759_a000304_esm1.pdf [file 1015-5759_a000304_esm1.pdf]

## ESM 1. Overview of questionnaires assessing reconciliation

| Authors             | Name of Scale                         | Sample studied                                                                              | Measured construct                                                                                                                                                                                                                                                                                                                                                                                                                                                                                                                 | Analysis                                                                                                                                                                                                                                     |
|---------------------|---------------------------------------|---------------------------------------------------------------------------------------------|------------------------------------------------------------------------------------------------------------------------------------------------------------------------------------------------------------------------------------------------------------------------------------------------------------------------------------------------------------------------------------------------------------------------------------------------------------------------------------------------------------------------------------|----------------------------------------------------------------------------------------------------------------------------------------------------------------------------------------------------------------------------------------------|
| Pham et al. 2004    | -                                     | Rwandans (randomized sample), N = 2091, random survey                                       | <b>Reconciliation:</b> defined as processes whereby individuals, social groups, and institutions (1) develop a shared vision and sense of collective future (“community”); (2) establish mutual ties and obligations across lines of social demarcation and ethnic groups (“interdependence”); (3) come to accept and actively promote individual rights, rule of law, tolerance of social diversity, and equality of opportunity (“social justice”); and (4) adopt nonviolent alternatives to conflict management (“nonviolence”) | Principal factor analysis confirmed 4-factor structure (not shown). Internal consistency of the 4 factors was: community, $\alpha = .69$ ; interdependence, $\alpha = .46$ ; social justice, $\alpha = .75$ ; and violence, $\alpha = .88$ . |
| Staub et al. 2005   | Orientation towards the other measure | Victims of genocide in Rwanda, N=194 not randomly selected                                  | <b>Forgiveness and Reconciliation</b>                                                                                                                                                                                                                                                                                                                                                                                                                                                                                              | Principal component analysis was done (results are not shown) resulting in a 1-factor solution. $\alpha$ between .68 and .87 at different assessment times.                                                                                  |
| Adam & Klasen, 2011 | Openness to Reconciliation (RECQ)     | N = 215 refugee children from Afghanistan, Bosnia and Kosovo aged 9-20, residing in Germany | <b>Attitudes towards Reconciliations</b>                                                                                                                                                                                                                                                                                                                                                                                                                                                                                           | 4 Subscales: 1. benevolence ( $\alpha = .74$ ), 2. Avoidance ( $\alpha = .70$ ), 3. Revenge ( $\alpha = .80$ ), orientation towards the future ( $\alpha = .73$ ). Factor analysis not reported                                              |
| Schaal et al. 2012  | -                                     | N = 269 imprisoned perpetrators and 114 survivors in Rwanda                                 | <b>Attitudes towards Reconciliation</b><br>Questionnaire consists of 16 items that examined attitudes toward forgiveness, future orientation, empathy, trust, justice, revenge, and the use of violence                                                                                                                                                                                                                                                                                                                            | 1 Scale with 16 items, Cronbach's alpha = .60, no factor analysis reported                                                                                                                                                                   |
